# Supplementary material
Source: PubMed Central journal article supplement (PMC8904298)
Supplement: NIHMS1762563-supplement-2.pdf [file NIHMS1762563-supplement-2.pdf]

**Supplementary Table S1** Gene sets of IFN- $\gamma$  response, effector genes, cytolytic score

|                                |         |          |          |         |
|--------------------------------|---------|----------|----------|---------|
| IFN- $\gamma$ Response (M5913) | Il10ra  | Trim26   | H2-Eb2   | Cdkn1a  |
| Stat1                          | Pla2g4a | Vcam1    | Gbp4     | Irf4    |
| Isg15                          | Trim21  | Cd274    | Lcp2     | Nfkb1   |
| Ifit1                          | Usp18   | Ciita    | H2-M3    | Batf2   |
| Mx2                            | Ptgs2   | Nampt    | Mt2      | H2-K1   |
| Ifit3b                         | Epsti1  | Selp     | Ripk1    | Lats2   |
| Ifi35                          | C1s2    | Gpr18    | Klrk1    | Irf5    |
| Irf7                           | Ddx58   | Fpr1     | Upp1     | Slamf7  |
| Ifit2                          | Il15    | Helz2    | Psmb2    | Isoc1   |
| Oas2                           | Nlrc5   | Psme2    | Tdrd7    | P2ry14  |
| Tap1                           | Nmi     | Serping1 | Hif1a    | Stat3   |
| Eif2ak2                        | Ido1    | Ccl5     | Eif4e3   | Ncoa3   |
| Rsad2                          | Psmb10  | Rnf31    | Vamp8    | H2-K1   |
| Mx2                            | Cxcl11  | Sod2     | Pfkip    | Il6     |
| Irf1                           | Itgb7   | Trim25   | Cd38     | Gzma    |
| Oas3                           | Samhd1  | Lap3     | Zbp1     | Ifnar2  |
| Tnfsf10                        | Herc6   | Psma3    | Bank1    | Cd74    |
| Irf9                           | Cmpk2   | Peli1    | Tor1b    | Rapgef6 |
| Cxcl10                         | Samd9l  | Cfb      | Rbck1    | Casp4   |
| Ifi44                          | Rtp4    | Cd86     | Pde4b    | Fas     |
| Bst2                           | Ptpn2   | Txnip    | Mvp      | Ogfr    |
| Xaf1                           | Parp14  | H2-Aa    | Il7      | Arl4a   |
| Sp110                          | Tnfaip2 | Gch1     | Bpgm     | Sri     |
| Oasl1                          | Ifitm2  | Pnp      | Cmtr1    | Lysmd2  |
| Psmb8                          | Plscr1  | Ccl7     | Auts2    | Csf2rb  |
| Ifi44l                         | Socs1   | Ptpn6    | B2m      | St3gal5 |
| Ifitm3                         | Casp1   | Sppl2a   | Ripk2    | C1ra    |
| Ddx60                          | Icam1   | Il4ra    | Cd69     | Casp3   |
| Lgals3bp                       | Wars    | Pnpt1    | Myd88    | Cmklr1  |
| Gbp3                           | Psme1   | Dhx58    | Psma2    | Nfkbia  |
| Irf8                           | Isg20   | Btg1     | Pim1     | Mettl7b |
| Psmb9                          | Irf2    | Casp8    | Nod1     | St8sia4 |
| Pml                            | Trim14  | Ifi30    | Cfh      | Xcl1    |
| Ifih1                          | Fcgr1   | Ccl12    | Tapbp    | Il2rb   |
| Ube2l6                         | March1  | Fgl2     | Slc25a28 | Vamp5   |
| Ifi27                          | Socs3   | Casp7    | Ptpn1    | Il18bp  |
| Adar                           | Jak2    | Sectm1a  | Tnfaip3  | Znfx1   |
| Ly6e                           | H2-DMA  | Il15ra   | Sspn     | Arid5b  |
| Stat2                          | Parp12  | Cd40     | Nup93    | Apol6   |
| Cxcl9                          | Tnfaip6 | Trafd1   | Mthfd2   | Stat4   |

|                            |           |         |          |         |
|----------------------------|-----------|---------|----------|---------|
| Effector Geneset (GSE9650) | Cdk1      | Gng11   | Mapk3    | Reps1   |
| Nlrp1a                     | Cdkn2c    | Gnpda1  | Mapre2   | Rfc4    |
| Acot7                      | Cdkn3     | Gzma    | Mbd2     | Rhpn2   |
| Actb                       | Chd7      | Gzme    | Mdfic    | Rnf14   |
| Actc1                      | Commd1    | Gzmk    | Med12l   | Rnf19b  |
| Actn4                      | Cox17     | Haspin  | Mis18bp1 | Rora    |
| Acyp2                      | Crip2     | Hk2     | Mns1     | Rps6ka4 |
| Adam19                     | Cstb      | H2-K1   | Mrpl27   | Rsu1    |
| Agpat3                     | Ctla4     | Hmgb2   | Mrps16   | S100a10 |
| Ahnak                      | Ctsa      | Hopx    | Msrp1    | S100a11 |
| Aip                        | Ctsd      | Hoxd13  | Mt2      | S100a13 |
| Anxa1                      | Cx3cr1    | Hsd11b1 | Myo1f    | S100a4  |
| Anxa2                      | Cxcr3     | Id2     | Ndufa8   | S100a6  |
| Anxa6                      | Dap       | Ifitm10 | Ndufb6   | Sf3b6   |
| Arf6                       | Dapk2     | Ifng    | Ndufb7   | Sgo1    |
| Arhgdib                    | Dbi       | Il10ra  | Ndufv3   | Sh2d1a  |
| Asl                        | Dcps      | Il18r1  | Nrp1     | Sh2d2a  |
| Atpif1                     | Dennd5a   | Il18rap | P3h4     | Sirt2   |
| Atp6v0e                    | Dhrs1     | Itga4   | Padi2    | Smap1   |
| Aurkb                      | Dkk2      | Itgal   | Pald1    | Smyd1   |
| Batf                       | Dlgap5    | Itgam   | Pcyt1a   | Snrnp27 |
| Bcl2a1b                    | Dock5     | Itgax   | Pglyrp1  | Sntb2   |
| Bhlhe40                    | Dtl       | Itgb1   | Plscr1   | Snx10   |
| Birc5                      | E2f8      | Jak1    | Ppib     | Spdl1   |
| Bscl2                      | Elovl1    | Kcnj8   | Pqlc3    | St3gal4 |
| Btf3                       | Entpd1    | Kif22   | Prdx4    | Stab1   |
| Capn2                      | Errfi1    | Klrc1   | Preld1   | Stard10 |
| Capns1                     | Etfb      | Klrg1   | Prf1     | Tcf19   |
| Carhsp1                    | Fadd      | Klrk1   | Prim2    | Tmem160 |
| Casp1                      | Fam89b    | Lamc1   | Prr13    | Tmem37  |
| Casp4                      | Fasl      | Lamtor5 | Prrc1    | Trappc1 |
| Casp7                      | Fcgr2b    | Lgals1  | Psma2    | Tspan31 |
| Ccl5                       | Fcgrt     | Lgals3  | Psmb10   | Tspo    |
| Ccne1                      | Fgl2      | Lig1    | Psmd8    | Ttk     |
| Ccr2                       | Frg1      | Litaf   | Ptgr1    | Txndc5  |
| Ccr5                       | Gabarapl1 | Lman2   | Ptpn13   | Unc119  |
| Cd160                      | Gabarapl2 | Lpin1   | Pttg1    | Wnt3    |
| Cd48                       | Galnt3    | Lrp10   | Rac2     | Xdh     |
| Cd68                       | Gem       | Lsm1    | Racgap1  | Ybx3    |
| Cdc34                      | Glrx      | Lxn     | Reep5    | Ykt6    |

|                 |
|-----------------|
| Cytolytic Score |
| Gzma            |
| Gzmb            |
| Prf1            |

**Supplementary Table S3** Primer and oligo sequences used in this study.

| <b>sgRNA sequences</b>     |                               |
|----------------------------|-------------------------------|
| sgTet2 1F                  | CACCGCGATGGTTGAGGGATCTCGT     |
| sgTet2 1R                  | aaacACGAGATCCCTCAACCATCGC     |
| sgTet2 2F                  | CACCGCTGACGGCTGCTTTTACCG      |
| sgTet2 2R                  | aaacCGGTAAAAGCAGCCGTCAGC      |
| sglfng1 F                  | CACCGCGACTTCAGGGTAAAATACG     |
| sglfng1 R                  | aaacCGTATTTACCCCTGAAGTCG      |
| <b>qPCR primers</b>        |                               |
| mlfng-F                    | CGGCACAGTCATTGAAAGCCTA        |
| mlfng-R                    | GTTGCTGATGGCCTGATTGTC         |
| mCxcl9-F                   | GAGCAGTGTGGAGTTCGAGG          |
| mCxcl9-R                   | TCCGGATCTAGGCAGGTTTG          |
| mCxcl10-F                  | AATGAGGGCCATAGGGAAGC          |
| mCxcl10-R                  | AGCCATCCACTGGGTAAAGG          |
| mTet2-F                    | AGAGAAGACAATCGAGAAGTCGG       |
| mTet2-R                    | CCTTCCGTA CTCCCAA ACTCAT      |
| m-Actb-F                   | CATTGCTGACAGGATGCAGAAGG       |
| m-Actb-R                   | TGCTGGAAGGTGGACAGTGAGG        |
| mCd80-F                    | GCAGGATACACCACTCCTCAA         |
| mCd80-R                    | AAAGACGAATCAGCAGCACAA         |
| mCd274-F                   | AGTATGGCAGCAACGTCACG          |
| mCd274-R                   | TCCTTTTCCAGTACACCACTA         |
| mlrf1-F                    | GGCCGATACAAAGCAGGAGAA         |
| mlrf1-R                    | GGAGTTCATGGCACAACGGA          |
| mlrf7-F                    | GAGACTGGCTATTGGGGGAG          |
| mlrf7-R                    | GACCGAAATGCTTCCAGGG           |
| mlfit3-F                   | GCTCAGGCTTACGTTGACAAGG        |
| mlfit3-R                   | CTTTAGGCGTGTCCATCCTTCC        |
| mCd74-F                    | AGTGCGACGAGAACGGTAAC          |
| mCd74-R                    | CGTTGGGGAACACACACCA           |
| mKrt19-F                   | GCCACCTACCTTGCTCGGATTG        |
| mKrt19-R                   | GTCTCTGCCAGCGTGCCTTC          |
| mKlf5-F                    | GGTTGCACAAAAGTTTATAC          |
| mKlf5-R                    | GGCTTGGCGCCCGTGTGCTTCC        |
| mKrt7-F                    | CGCCGCTGAGTGTGGACATCG         |
| mKrt7-R                    | CTGGCTGCTCTTGGCTGACTTCTG      |
| hCD274-F                   | TGCCGACTACAAGCGAATTACTG       |
| hCD274-R                   | CTGCTTGTCCAGATGACTTCGG        |
| hIRF1-F                    | GAGGAGGTGAAAGACCAGAGCA        |
| hIRF1-R                    | TAGCATCTCGGCTGGACTTCGA        |
| hIFIT3-F                   | CCTGGAATGCTTACGGCAAGCT        |
| hIFIT3-R                   | GAGCATCTGAGAGTCTGCCCAA        |
| hACTB-F                    | CACCATTGGCAATGAGCGGTTT        |
| hACTB-R                    | AGGTCTTTGCGGATGTCCACGT        |
| <b>hMeDIP qPCR primers</b> |                               |
| mCd274-F                   | AACACTAGATACCTAAACTGAAAGCTTCC |
| mCd274-R                   | GGCCCGGAGGCGG                 |
| mlrf1-F                    | CTCAATTTCCAGAGCAGCC           |
| mlrf1-R                    | CCTCTTTCTGCAGACTCCCA          |
| <b>Genotyping primers</b>  |                               |
| gldh1F1                    | GTCAAAGGCTGGCATGGTATAAT       |
| gldh1R1                    | TGGGCTCTATGGATAACTTCGTA       |
| gldh1R2                    | GAGGACCTGAGTAACTCCCTTTT       |

|                   |                         |
|-------------------|-------------------------|
| gKras- 22907      | TGTCTTTCCCCAGCACAGT     |
| gKras- 22908      | CTGCATAGTACGCTATACCCTGT |
| gKras- oIMR9592   | GCAGGTCGAGGGACCTAATA    |
| gAlb-Cre- 20239   | TGCAAACATCACATGCACAC    |
| gAlb-Cre- 20240   | TTGGCCCCTTACCATAACTG    |
| gAlb-Cre-oIMR5374 | GAAGCAGAAGCTTAGGAAGATGG |

**Supplementary Table S4** Cell type classification and labeling for calculating differentially expressed marker genes

| Cell type                 | Gene1          | Gene2          | Gene3         | Gene4         | Gene5         | Gene6         | Gene7         | Gene8       | Gene9      | Gene10      |
|---------------------------|----------------|----------------|---------------|---------------|---------------|---------------|---------------|-------------|------------|-------------|
| M1                        | <i>Itgam</i>   | <i>Ctsc</i>    | <i>Cd74</i>   | <i>C1qa</i>   | <i>Cxcl9</i>  | <i>Vcam1</i>  | <i>Cd38</i>   |             |            |             |
| M2                        | <i>Itgam</i>   | <i>Lyz2</i>    | <i>C1qb</i>   | <i>Folr2</i>  | <i>Mrc1</i>   | <i>Arg1</i>   | <i>Egr2</i>   | <i>Lgmn</i> | <i>Il6</i> | <i>Cd74</i> |
| MDSC                      | <i>Itgam</i>   | <i>Arg1</i>    | <i>Fn1</i>    | <i>Nos2</i>   | <i>Pf4</i>    | <i>Il1rn</i>  |               |             |            |             |
| Neutrophils               | <i>Itgam</i>   | <i>S100a9</i>  | <i>S100a8</i> | <i>Malat1</i> | <i>Ly6g</i>   |               |               |             |            |             |
| Neutrophil-like-monocytes | <i>Il1b</i>    | <i>S100a9</i>  | <i>S100a8</i> | <i>Ly6g</i>   | <i>Ms4a4c</i> | <i>Ly6c2</i>  |               |             |            |             |
| Monocyte                  | <i>Itgam</i>   | <i>Ms4a6c</i>  | <i>Lyz2</i>   | <i>Il1b</i>   | <i>Cxcl10</i> | <i>Ms4a4c</i> | <i>Ly6c2</i>  |             |            |             |
| DCs                       | <i>H2-Aa</i>   | <i>Cd74</i>    | <i>Flt3</i>   | <i>Cd209a</i> | <i>Zbtb46</i> | <i>Batf3</i>  | <i>H2-Ab1</i> |             |            |             |
| pDCs                      | <i>Siglech</i> | <i>Bst2</i>    | <i>Ccr9</i>   |               |               |               |               |             |            |             |
| Fibroblasts               | <i>Sparc</i>   | <i>Cd63</i>    | <i>Dcn</i>    | <i>Col3a1</i> | <i>Col1a2</i> | <i>Plaur</i>  |               |             |            |             |
| Suppressive Stroma        | <i>C1qb</i>    | <i>H2-Eb1</i>  | <i>ApoE</i>   | <i>Arg1</i>   | <i>C1qa</i>   |               |               |             |            |             |
| Adipocytes                | <i>Cd5l</i>    | <i>Ctsb</i>    | <i>Il1b</i>   | <i>Il6</i>    | <i>Cd274</i>  |               |               |             |            |             |
| Endothelial               | <i>Sparc</i>   | <i>Selenop</i> | <i>Pecam1</i> | <i>Lyve1</i>  | <i>Tek</i>    |               |               |             |            |             |
| MAST Cells                | <i>Srgn</i>    | <i>Lilr4b</i>  | <i>Cpa3</i>   |               |               |               |               |             |            |             |
| Tcells                    | <i>Cd8a</i>    | <i>Cd3d</i>    | <i>Trbc2</i>  | <i>Cd4</i>    | <i>Pdcd1</i>  |               |               |             |            |             |
| Bcells                    | <i>Cd79a</i>   | <i>Ighm</i>    | <i>Cd79b</i>  | <i>Cd19</i>   | <i>Ms4a1</i>  | <i>Cd22</i>   |               |             |            |             |
| Plasma Cells              | <i>Jchain</i>  | <i>Igkc</i>    | <i>Slamf7</i> |               |               |               |               |             |            |             |
| Nk cells                  | <i>Ncr1</i>    | <i>Gzma</i>    | <i>Gzmb</i>   | <i>Klra7</i>  | <i>Klre1</i>  |               |               |             |            |             |
| Proliferating Tcells      | <i>Stmn1</i>   | <i>Hmgb2</i>   | <i>Top2a</i>  | <i>Cenpe</i>  | <i>Mki67</i>  |               |               |             |            |             |

**Supplementary Table S5** Gene list of HNF4 $\alpha$  target genes from TRANSFAC Predicted Transcription Factor Targets

|                            |           |         |          |
|----------------------------|-----------|---------|----------|
| HNF4 $\alpha$ target genes | TNFAIP8L2 | CMIP    | SYAP1    |
| RSPO1                      | ZBTB42    | NARS    | SPSB2    |
| CILP                       | RNFT2     | GPN3    | PCSK7    |
| PLXDC2                     | OSBPL5    | RAE1    | ESPL1    |
| DCN                        | RAB18     | SHANK2  | PQLC1    |
| LTF                        | HIST1H2BL | POLR2D  | CLSTN2   |
| CRISP1                     | COMMD7    | RDH11   | CSRP2    |
| COL6A5                     | PROSER2   | PXDN    | SMARCA5  |
| ACP5                       | KBTBD6    | ALDH3B1 | PHF6     |
| ITGB8                      | UBA7      | MARK2   | PLAT     |
| ELN                        | BMP1      | ESYT1   | LAMC1    |
| CERS4                      | LYN       | MKL2    | RPS26    |
| FAIM2                      | AFP       | NDUFB4  | NR2F2    |
| MUC1                       | TXNDC5    | SFXN2   | MRT04    |
| FAM83A                     | JUP       | PIP5K1B | KDM5A    |
| PI16                       | INTU      | TNFSF10 | MRPL20   |
| TMEM45A                    | ARHGEF3   | EXOSC10 | NLE1     |
| MDFI                       | EPB41L1   | PLRG1   | SF3B2    |
| IGSF9B                     | ENDOG     | RANBP3  | LPAR2    |
| CNTLN                      | CLSTN1    | STK4    | RRBP1    |
| LAMC2                      | RPS6KA4   | SSR4    | ERC1     |
| EMILIN1                    | FAM216A   | VEGFA   | CTNBL1   |
| SLC36A4                    | ADAMTS12  | EHBP1L1 | RAB4B    |
| TMEM229B                   | MINPP1    | ARFIP1  | TOMM34   |
| ITIH2                      | XKRX      | CYB5B   | RAB3IP   |
| BLK                        | EXOSC9    | OXR1    | XRCC5    |
| PPP1R26                    | ACMSD     | DENR    | TAB3     |
| CCRL2                      | VPS26B    | CHCHD1  | CBX4     |
| CDC42EP3                   | CSNK1G2   | COX8A   | RABGAP1  |
| MAN1C1                     | PLEC      | PTPRG   | CISD3    |
| IKBKG                      | ATG4C     | HSBP1   | BPTF     |
| WNK2                       | FIS1      | TCF20   | ENY2     |
| SLC7A7                     | CYB5R3    | LYRM2   | FMN1     |
| SLC26A4                    | ATXN1L    | TBL1X   | STIP1    |
| PTPRR                      | MAF1      | BAG4    | CUEDC2   |
| CRLF1                      | GTPBP10   | RNF103  | POGZ     |
| SH3TC2                     | UBLCP1    | TOP2B   | ARHGAP21 |
| ESRP2                      | GNAI2     | NUDCD1  | BCL3     |
| SERPINA7                   | FZD4      | LINGO1  | ERCC1    |
| KCTD21                     | DMRTA2    | ZBTB38  | DGKA     |
| TMEM185B                   | ALDH3A2   | SNX12   | GAS8     |
| CYTH4                      | FAM89B    | DLD     | PITPNM1  |
| ELAC1                      | ORAI2     | RUFY3   | NMI      |
| HTR1B                      | HYAL1     | ERCC3   | FADS2    |
| ST8SIA4                    | NCOA1     | CSAD    | LIF      |
| SCN5A                      | GEMIN7    | GPHN    | SMCR8    |

|          |          |          |         |
|----------|----------|----------|---------|
| MALL     | STK38L   | TMEM175  | NFIA    |
| COL18A1  | RPUSD1   | RCBTB2   | DCAF6   |
| NR1H3    | HMG3     | CREBRF   | ZFP36L1 |
| CNTNAP2  | CLPB     | TMEM183A | RPL10A  |
| SLC13A2  | ME2      | SMIM11   | SMS     |
| RBP1     | TRIM5    | PNO1     | THSD1   |
| HIST1H3H | N4BP3    | ECHS1    | KIF11   |
| CDA      | CALCRL   | MALT1    | FASTKD2 |
| AWAT2    | HSPA13   | MPC2     | CDR2L   |
| PSKH1    | DNAL4    | SLC12A6  | ZHX3    |
| GNE      | ARHGEF17 | SLC9A8   | COMP    |
| MYLK     | SEC61G   | NOD1     | ANKRD17 |
| RHBDD2   | SNW1     | BCAT2    | RASD1   |
| RGS16    | AP2S1    | MCOLN1   | NTNG2   |
| CCDC8    | ABHD16B  | NOL4     | STYXL1  |
| GPT      | PTPN22   | CCDC114  | CD46    |
| KIFC2    | ODF2L    | CHST1    | CRYBA1  |
| MAFK     | SIRT1    | SLC10A1  | SLC23A1 |
| CIART    | DTL      | ARHGEF4  | CHRM4   |
| ARID3B   | CHD5     | COL2A1   | MMRN2   |
| TMEM251  | COL20A1  | FKBP11   | IFNE    |
| IFITM5   | EFCAB5   | TAS1R3   | VSIG2   |
| USP37    | NR1D2    | PLCD4    | ACRV1   |
| IRX3     | DNASE1   | ADRA2A   | POU5F2  |
| COL6A2   | CUBN     | CABP7    | PRR29   |
